# Supplementary figures and images for: Targeting ANXA1 abrogates Treg-mediated immune suppression in triple-negative breast cancer
Source: PubMed Central journal article supplement — J Immunother Cancer. 2020 Apr 16;8(1):e000169. doi: 10.1136/jitc-2019-000169 (PMC7204868; doi:10.1136/jitc-2019-000169), 2020-04-16

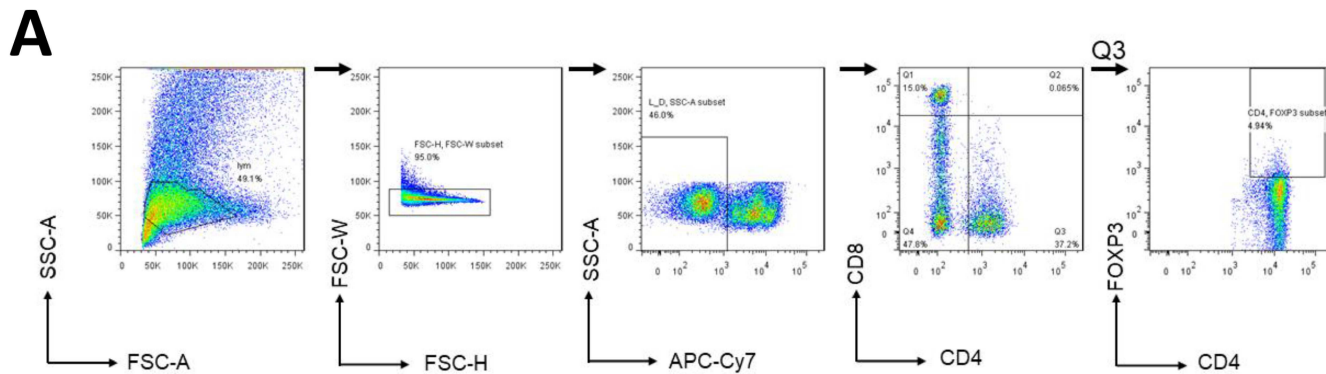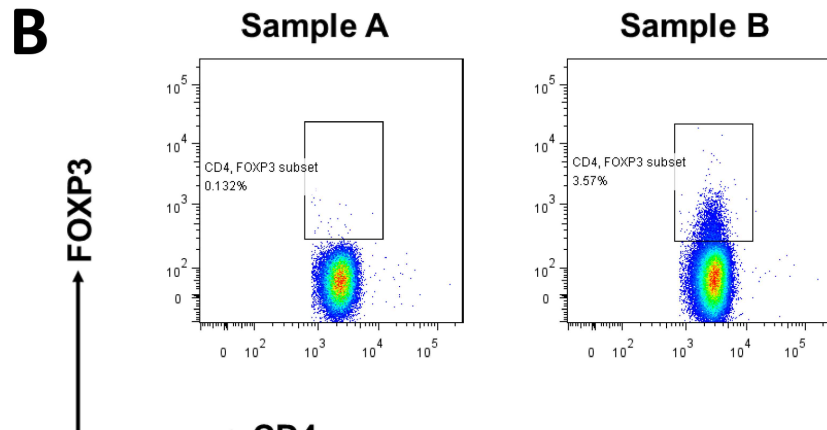

Supplement: jitc-2019-000169supp002.pdf [file jitc-2019-000169supp002.pdf]

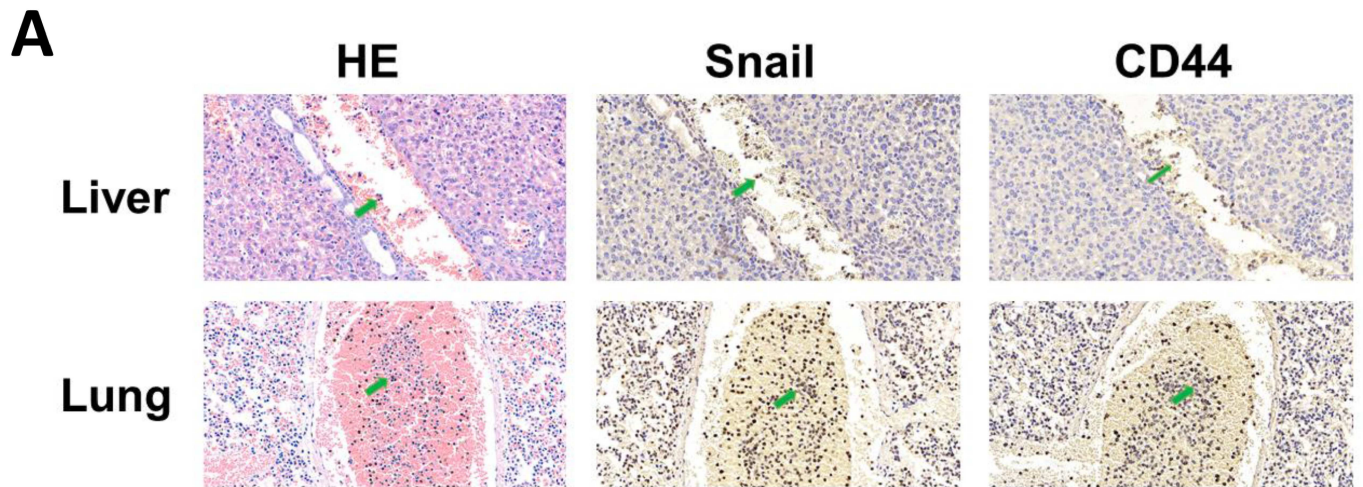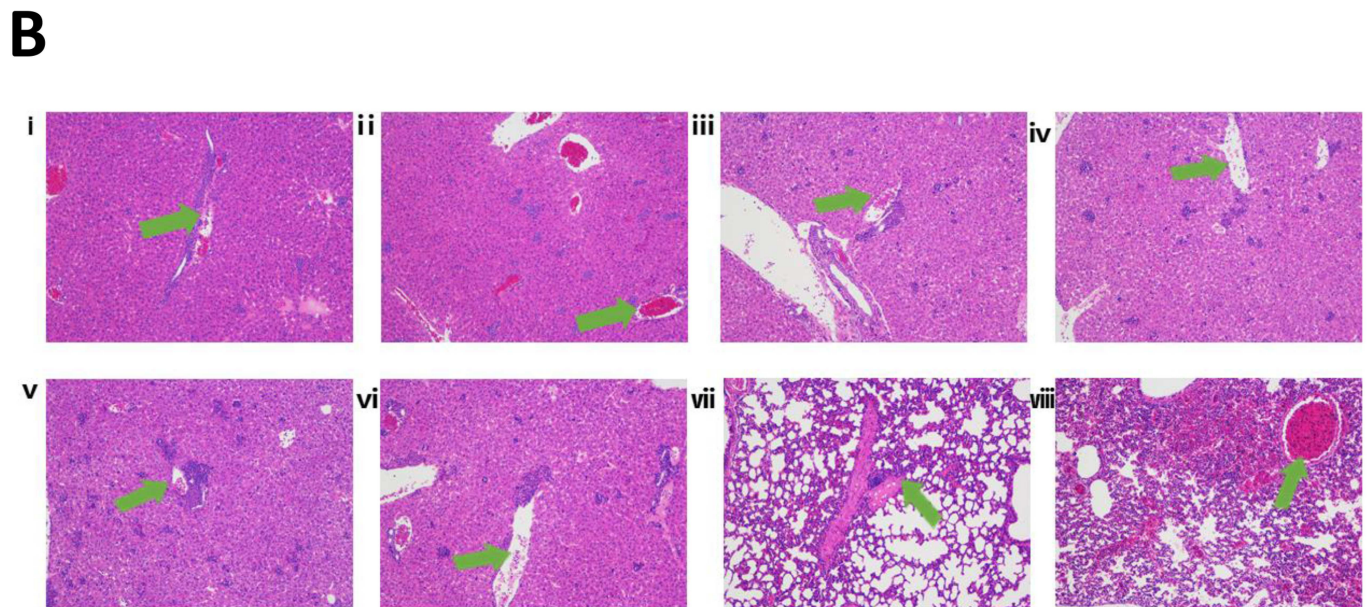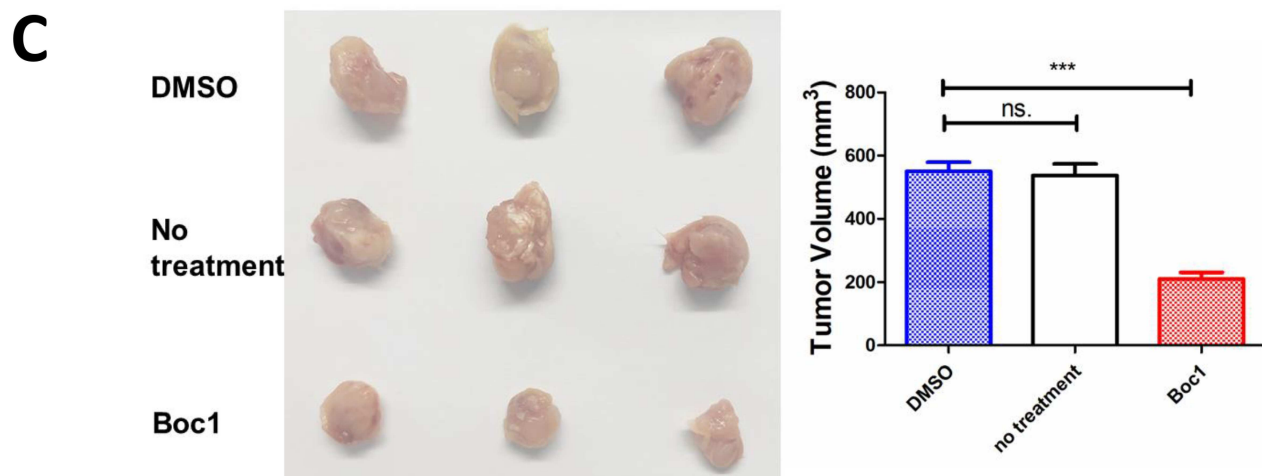

Supplement: jitc-2019-000169supp004.pdf [file jitc-2019-000169supp004.pdf]
